# Supplementary material
Source: ML conference proceedings conference paper supplement (https://proceedings.neurips.cc/paper_files/paper/2016/hash/dfa92d8f817e5b08fcaafb50d03763cf-Abstract.html)
Supplement: Supplementary file [file dfa92d8f817e5b08fcaafb50d03763cf-Supplemental.zip]

## A A Supplementary Lemma

**Lemma 2.** *Let  $\epsilon_t$  be Rademacher random vectors, and  $Z_t$  be non-negative real-valued random variables, such that  $\mathbb{E}[Z_t^2] \leq M$ . Then:*

$$\mathbb{E}_{Z_{1:T}, \epsilon_{1:T}} \left[ \max_{\pi \in \Pi} \sum_{t=1}^T \epsilon_t(\pi(x_t)) \cdot Z_t \right] \leq \sqrt{2TM \log(N)}$$

**Proof:**

$$\begin{aligned} \mathbb{E}_{Z_{1:T}, \epsilon_{1:T}} \left[ \max_{\pi \in \Pi} \sum_{t=1}^T \epsilon_t(\pi(x_t)) \cdot Z_t \right] &= \mathbb{E}_{Z_{1:T}} \left[ \frac{1}{\lambda} \mathbb{E}_{\epsilon_{1:T}} \left[ \log \left( \max_{\pi \in \Pi} e^{\lambda \sum_{t=1}^T \epsilon_t(\pi(x_t)) \cdot Z_t} \right) \right] \right] \\ &\leq \mathbb{E}_{Z_{1:T}} \left[ \frac{1}{\lambda} \log \left( \mathbb{E}_{\epsilon_{1:T}} \left[ \max_{\pi \in \Pi} e^{\lambda \sum_{t=1}^T \epsilon_t(\pi(x_t)) \cdot Z_t} \right] \right) \right] \\ &\leq \mathbb{E}_{Z_{1:T}} \left[ \frac{1}{\lambda} \log \left( \mathbb{E}_{\epsilon_{1:T}} \left[ \sum_{\pi \in \Pi} e^{\lambda \sum_{t=1}^T \epsilon_t(\pi(x_t)) \cdot Z_t} \right] \right) \right] \\ &= \mathbb{E}_{Z_{1:T}} \left[ \frac{1}{\lambda} \log \left( \sum_{\pi \in \Pi} \mathbb{E}_{\epsilon_{1:T}} \left[ \prod_{t=1}^T e^{\lambda \epsilon_t(\pi(x_t)) \cdot Z_t} \right] \right) \right] \\ &= \mathbb{E}_{Z_{1:T}} \left[ \frac{1}{\lambda} \log \left( \sum_{\pi \in \Pi} \prod_{t=1}^T \mathbb{E}_{\epsilon_t} \left[ e^{\lambda \epsilon_t(\pi(x_t)) \cdot Z_t} \right] \right) \right]. \end{aligned}$$

Now observe that  $\mathbb{E}_{\epsilon_t} \left[ e^{\lambda \epsilon_t(\pi(x_t)) \cdot Z_t} \right] = \frac{e^{\lambda \cdot Z_t} + e^{-\lambda \cdot Z_t}}{2} \leq e^{\lambda^2 \cdot Z_t^2 / 2}$ . Thus

$$\begin{aligned} \mathbb{E}_{Z_{1:T}, \epsilon_{1:T}} \left[ \max_{\pi \in \Pi} \sum_{t=1}^T \epsilon_t(\pi(x_t)) \cdot Z_t \right] &\leq \mathbb{E}_{Z_{1:T}} \left[ \frac{1}{\lambda} \log \left( \sum_{\pi \in \Pi} \prod_{t=1}^T e^{\lambda^2 \cdot Z_t^2 / 2} \right) \right] \\ &= \mathbb{E}_{Z_{1:T}} \left[ \frac{1}{\lambda} \log \left( N e^{\lambda^2 \sum_{t=1}^T Z_t^2 / 2} \right) \right] \\ &= \frac{1}{\lambda} \log(N) + \lambda \mathbb{E}_{Z_{1:T}} \left[ \sum_{t=1}^T Z_t^2 / 2 \right] \\ &\leq \frac{1}{\lambda} \log(N) + \lambda MT / 2. \end{aligned}$$

Optimizing over  $\lambda$  yields the result. ■
